# Supplementary material
Source: Royal Society of Chemistry journal article supplement (doi:10.1039/d5ma01448d)
Supplement: d5ma01448d1.pdf [file d5ma01448d1.pdf]

## Supplementary Information

### Polymer Wire Wetware Synapse with Improved Endurance for Physical Neuromorphic Implementation

Adrian D. Go<sup>a</sup>, Seiya Watanabe<sup>a</sup>, Hiroyuki S. Kato<sup>a</sup> and Megumi Akai-Kasaya<sup>a,\*</sup>

<sup>a</sup>Department of Chemistry, Graduate School of Science, The University of Osaka, Osaka, Japan

\*Correspondence: akai@chem.sci.osaka-u.ac.jp

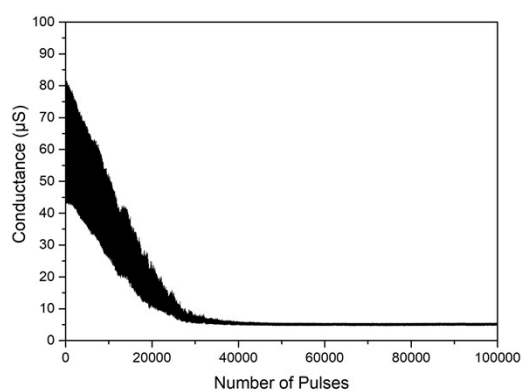

**Fig. S1** Operation of polymer wire device in water at reduced voltage ( $\pm 0.8$  V and 25 ms pulse width). The reduced voltage condition resulted in slower degradation and produced a lower conductance switching range.

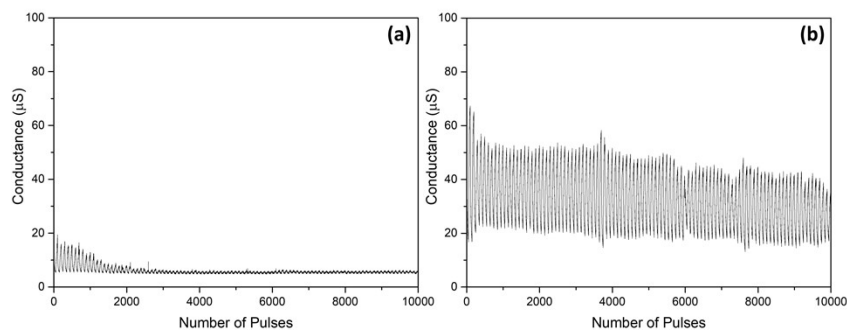

**Fig. S2** Operation of polymer wire device in other solvent systems at  $\pm 1.1$  V and 25 ms pulse width (a) in DMSO (b) in 1,2-propanediol. To further assess whether the improved endurance is specific to EG, the additional solvent systems were examined. Operation in DMSO and 1,2-propanediol resulted in lower  $G_{\max}/G_{\min}$  and poorer stability than in EG. Additionally, low-protic solvents such as propylene carbonate were not suitable to be tested because of insufficient SDBS solubility.

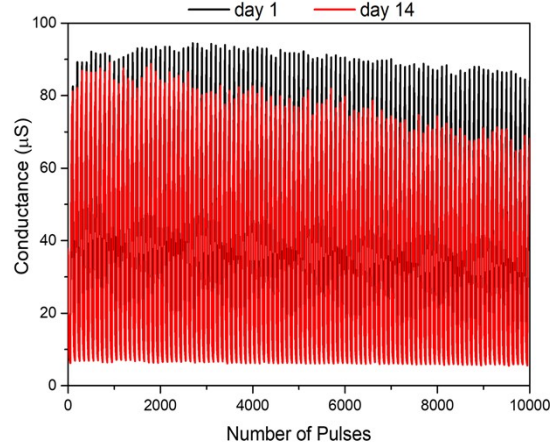

**Fig. S3** Switching behavior of the device measured on Day 1 and Day 14 after storage at room temperature. The initial switching window was maintained after 14 days of storage, while a decrease in  $G_{\max}$  was observed at later cycles relative to Day 1. The measurement was conducted over 100 cycles.

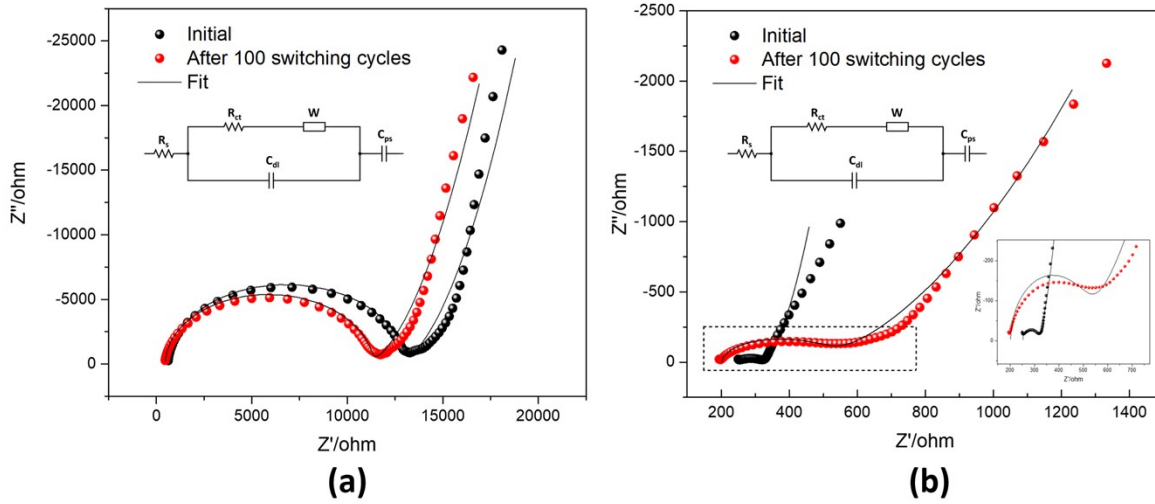

**Fig. S4** Equivalent circuit fitting of the EIS. (a) operation in ethylene glycol (b) operation in water media

**Table S1.** Values for the Circuit Elements

| Circuit elements                      | $R_s$ ( $\Omega$ ) | $R_{ct}$ ( $\Omega$ ) | $W$ ( $\Omega s^{1/2}$ ) | $C_{dl}$ (F)           | $C_{ps}$ (F)           | Error   |
|---------------------------------------|--------------------|-----------------------|--------------------------|------------------------|------------------------|---------|
| In EG (initial)                       | 628.4              | 12240                 | $1.385 \times 10^{-4}$   | $7.756 \times 10^{-9}$ | $7.599 \times 10^{-5}$ | 0.04641 |
| In EG (after 100 switching cycles)    | 470.4              | 10730                 | $1.439 \times 10^{-4}$   | $7.442 \times 10^{-9}$ | $8.424 \times 10^{-5}$ | 0.05506 |
| In water (initial)                    | 252.3              | 57.7                  | $1.746 \times 10^{-4}$   | $5.700 \times 10^{-7}$ | $1.652 \times 10^{-4}$ | 0.03469 |
| In water (after 100 switching cycles) | 202.7              | 300.8                 | $3.851 \times 10^{-4}$   | $4.557 \times 10^{-7}$ | $1.321 \times 10^{-4}$ | 0.05548 |

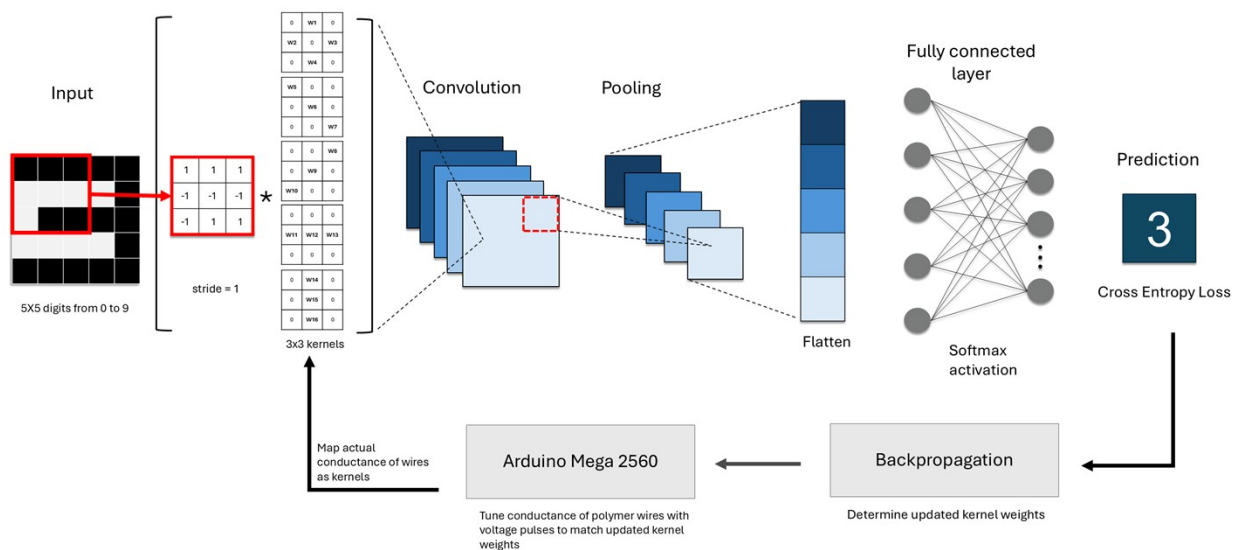

Fig. S5 CNN architecture workflow using the polymer wire based synaptic device as kernels.

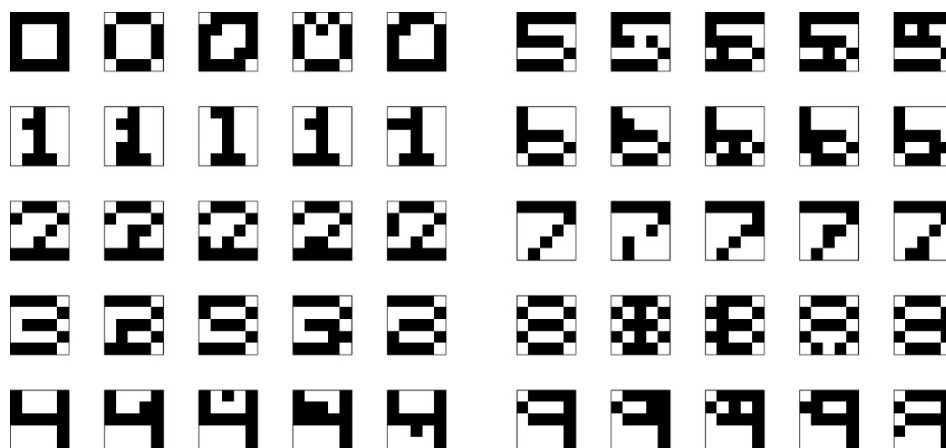

Fig. S6 Digit input toy dataset with additive noise for sample variation.

|    |    |    |    |    |    |     |    |    |     |     |     |   |     |   |
|----|----|----|----|----|----|-----|----|----|-----|-----|-----|---|-----|---|
| 0  | W1 | 0  | W5 | 0  | 0  | 0   | 0  | W8 | 0   | 0   | 0   | 0 | W14 | 0 |
| W2 | 0  | W3 | 0  | W6 | 0  | 0   | W9 | 0  | W11 | W12 | W13 | 0 | W15 | 0 |
| 0  | W4 | 0  | 0  | 0  | W7 | W10 | 0  | 0  | 0   | 0   | 0   | 0 | W16 | 0 |

Fig. S7 Kernel matrix used for training. Each W1-W16 represents the conductance state of the synaptic polymer wire. The maximum and minimum conductance [ $G_{\max}$  ( $\times 0.90$ ) and  $G_{\min}$ ] of each wire was initially obtained and was used to normalize all the values to [0, 1].
